# Supplementary material for: Effects of autophagy-inhibiting chemicals on sialylation of Fc-fusion glycoprotein in recombinant CHO cells
Source: Springer Nature journal article supplement (doi:10.1007/s00253-024-13059-9), 2024-02-20
Supplement: MOESM1 [file 253_2024_13059_MOESM1_ESM.pdf]

## **Supplementary data**

---

Effects of autophagy-inhibiting chemicals on sialylation of Fc-fusion glycoprotein in recombinant CHO cells

Hoon-Min Lee<sup>1,2</sup>, Jong-Ho Park<sup>1,3</sup>, Tae-Ho Kim<sup>1,4</sup>, Hyun-Seung Kim<sup>1,2</sup>, Dae Eung Kim<sup>5</sup>,  
Mi Kyeong Lee<sup>5</sup>, Jungmok You<sup>4</sup>, Gyun Min Lee<sup>3</sup>, and Yeon-Gu Kim<sup>1,2\*</sup>

Running title: Effect of autophagy inhibition on sialylation in rCHO cells

<sup>1</sup>*Biotherapeutics Translational Research Center, Korea Research Institute of Bioscience and Biotechnology (KRIBB), 125 Gwahak-ro, Yuseong-gu, Daejeon, Korea*

<sup>2</sup>*Department of Bioprocess Engineering, KRIBB School of Biotechnology, University of Science and Technology (UST), 217 Gajeong-ro, Yuseong-gu, Daejeon, Korea*

<sup>3</sup>*Department of Biological Sciences, KAIST, 335 Gwahak-ro, Yuseong-gu, Daejeon, Korea*

<sup>4</sup>*Department of Plant and Environmental New Resources, Graduate School of Biotechnology, College of Life Science, Kyung Hee University, 1732 Deogyeong-daero, Giheung-gu, Yongin-si, Gyeonggi-do, Korea*

<sup>5</sup>*College of Pharmacy, Chungbuk National University, Cheongju 28160, Korea*

---

\* *Correspondence to: Dr. Yeon-Gu Kim*

Tel: +82-42-860-4196; fax: +82-42-860-4149; e-mail: [ygkim@kribb.re.kr](mailto:ygkim@kribb.re.kr)

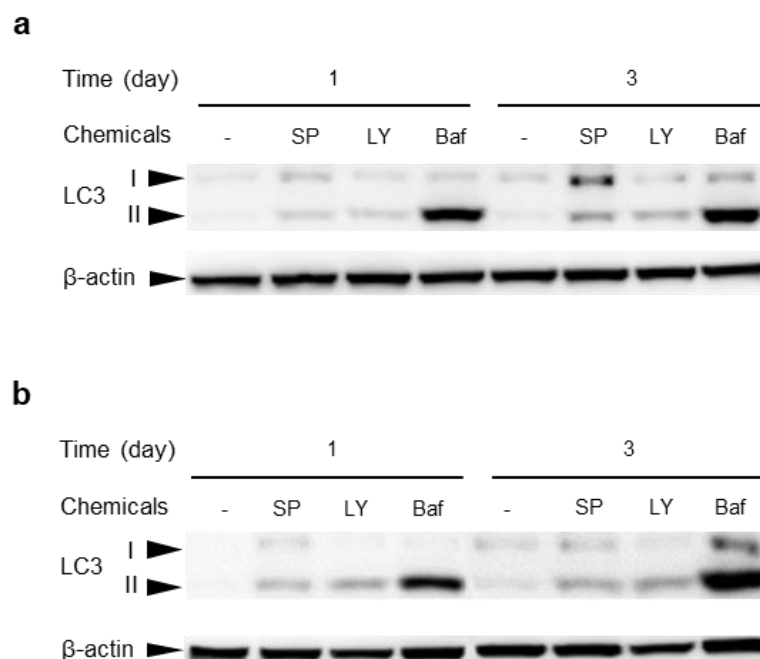

**Fig. S1** Western blot analysis of the total cellular proteins from cultures in the absence and presence of three autophagy inhibitors in **a** DUKX-Fc cells and **b** DG44-Fc cells. Without autophagy inhibitor (-), with SP600125 (SP), with LY294002 (LY), and with BafA1 (Baf). An equal amount of cellular proteins from cell lysates at days 1 and 3 was separated on a 12% Bis-Tris NuPAGE gel.

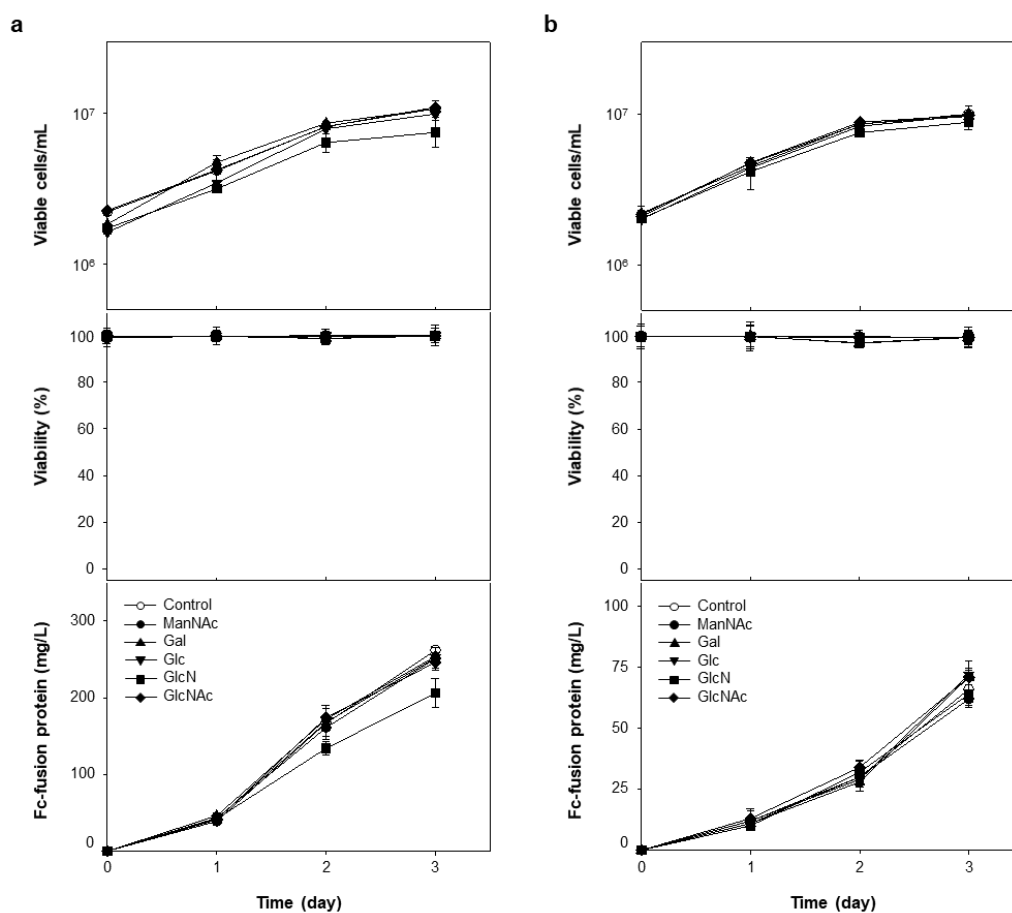

**Fig. S2** Profiles of cell growth, viability, and Fc-fusion glycoprotein production of two rCHO cell lines individually supplemented with five nucleotide sugar precursors. **a** DUKX-Fc cells and **b** DG44-Fc cells. Without nucleotide sugar precursor (open circle), with ManNAc (closed circle), with Gal (closed up-triangle), with Glc (closed down-triangle), with GlcN (closed square), and with GlcNAc (closed diamond). Error bars represent the standard deviations of triplicate experiments

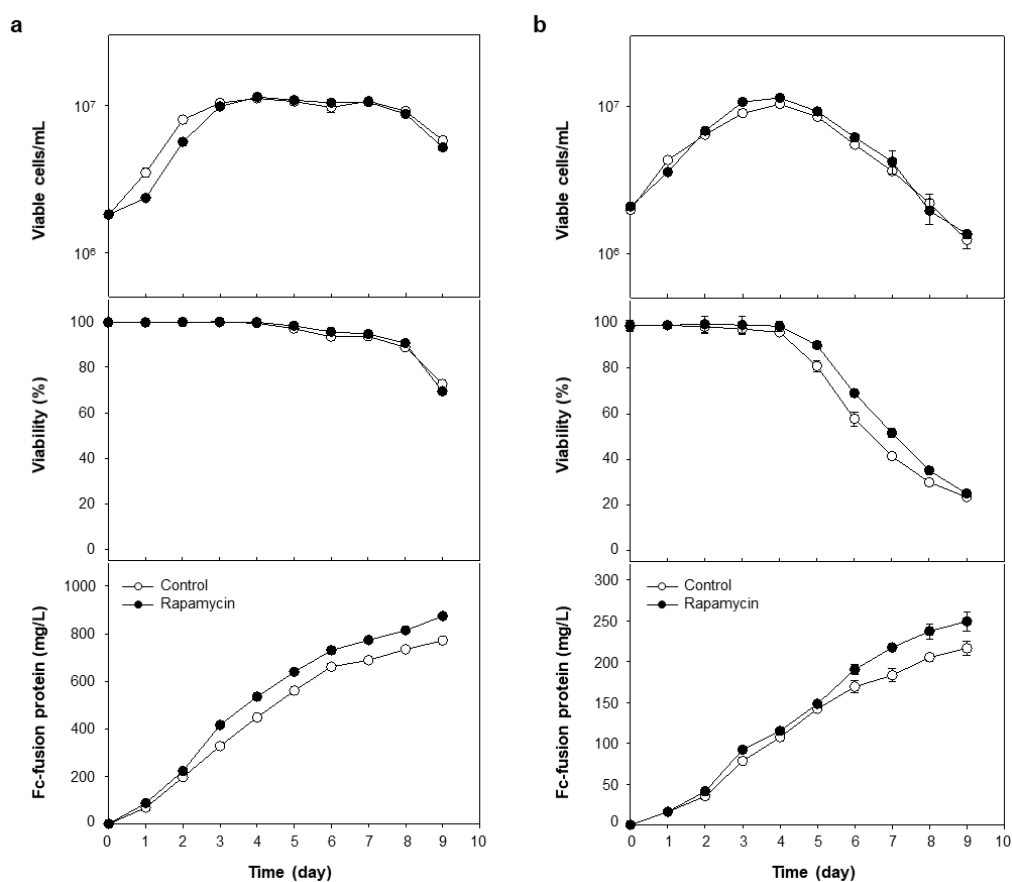

**Fig. S3** Profiles of cell growth, viability, and Fc-fusion glycoprotein production of two rCHO cell lines in the absence and presence of rapamycin, a typical autophagy inducer. **a** DUKX-Fc cells and **b** DG44-Fc cells. Without rapamycin (open circle) and with 200 nM rapamycin (closed circle). Error bars represent the standard deviations of triplicate experiments

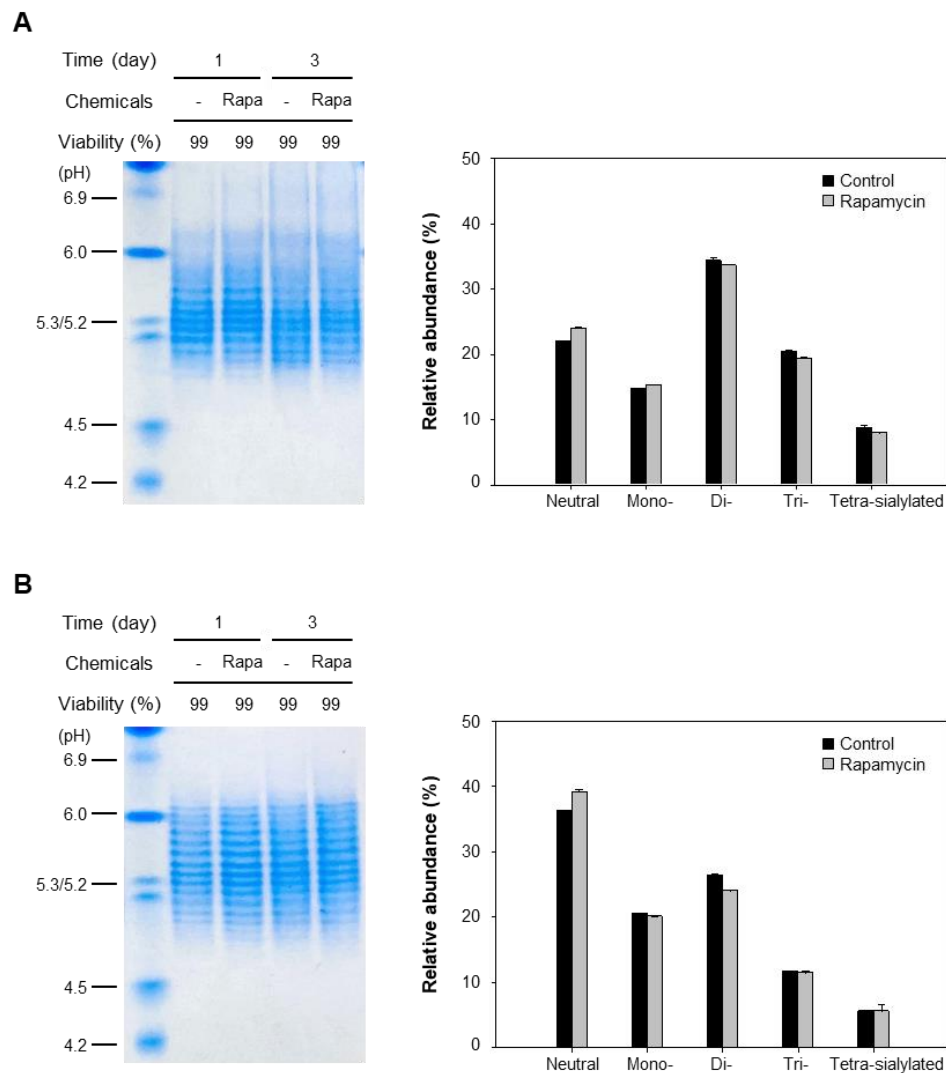

**Fig. S4** Isoelectric focusing (IEF) gel analysis and sialylated *N*-glycan profiles obtained from purified Fc-fusion glycoprotein produced in the absence (- and black bar) and presence (Rapa and gray bar) of rapamycin in **a** DUKX-Fc cells and **b** DG44-Fc cells. Samples were taken on days 1 and 3 of the cultures, as shown in Fig. S2. IEF gel analysis was performed in triplicate experiments. Error bars in sialylated *N*-glycan analysis represent standard deviations calculated from triplicate experiments
